# Supplementary material for: Probabilistic and Machine Learning Methods for Uncertainty Quantification in Power Outage Prediction due to Extreme Events
Source: Copernicus journal article supplement (doi:10.5194/egusphere-2022-975), 2022-10-10
Supplement: Supplementary file 1 [file egusphere-2022-975-supplement.pdf]

**Supporting Information to**

**Review Article: Probabilistic and Machine Learning Methods  
for Uncertainty Quantification in Power Outage Prediction  
due to Extreme Events**

Prateek Arora<sup>1(\*)</sup>, Luis Ceferino<sup>1,2</sup>

<sup>1</sup>Civil and Urban Engineering Department, New York University

<sup>2</sup>Center for Urban Science and Progress, New York University

(\*) Corresponding author: Prateek Arora (prateek.arora@nyu.edu)

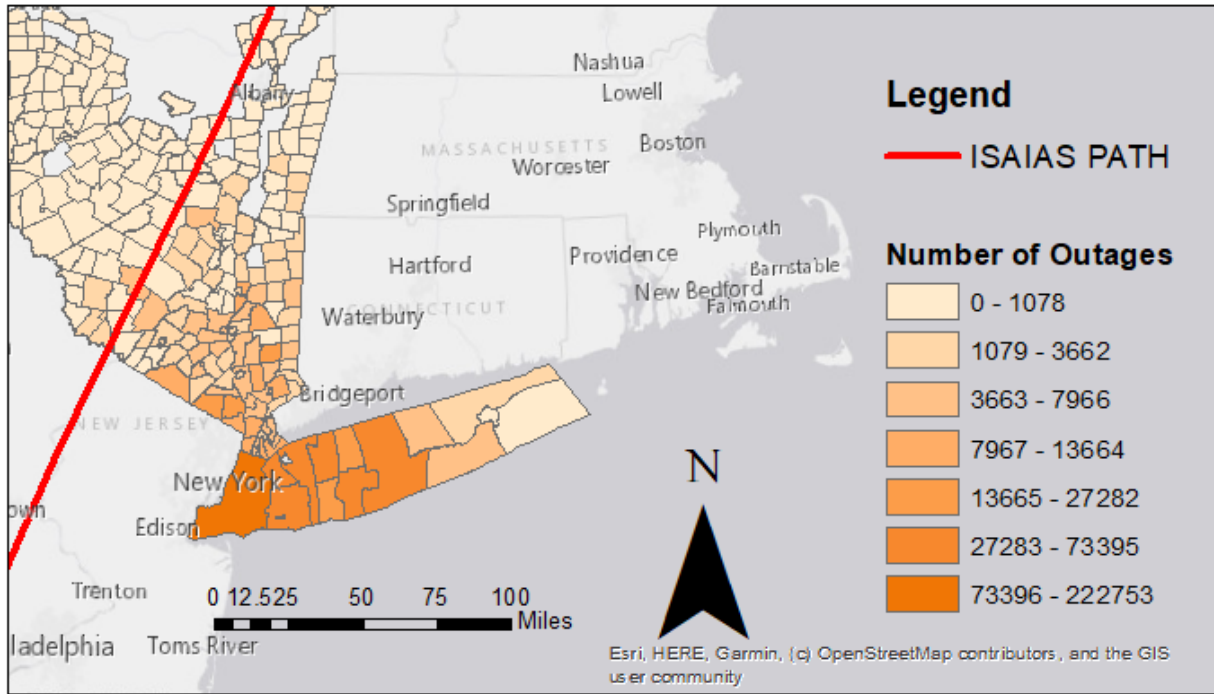

**Supplementary Figure S1.** Power outages caused by Hurricane Isaias (2020) in New York

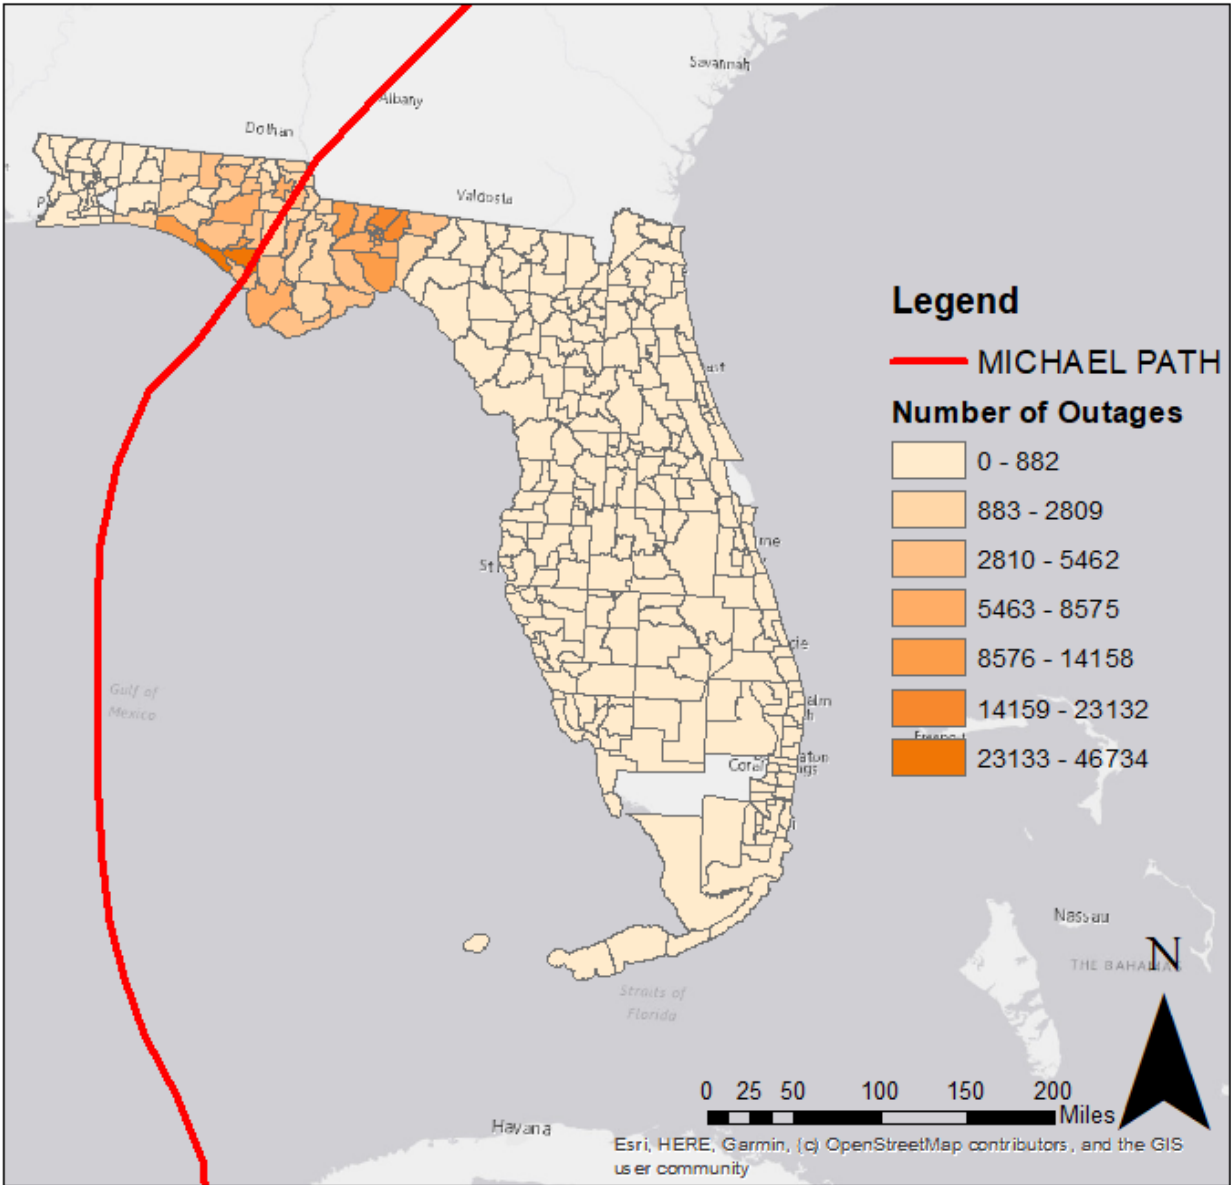

**Supplementary Figure S2.** Power outages caused by Hurricane Michael (2018) in Florida

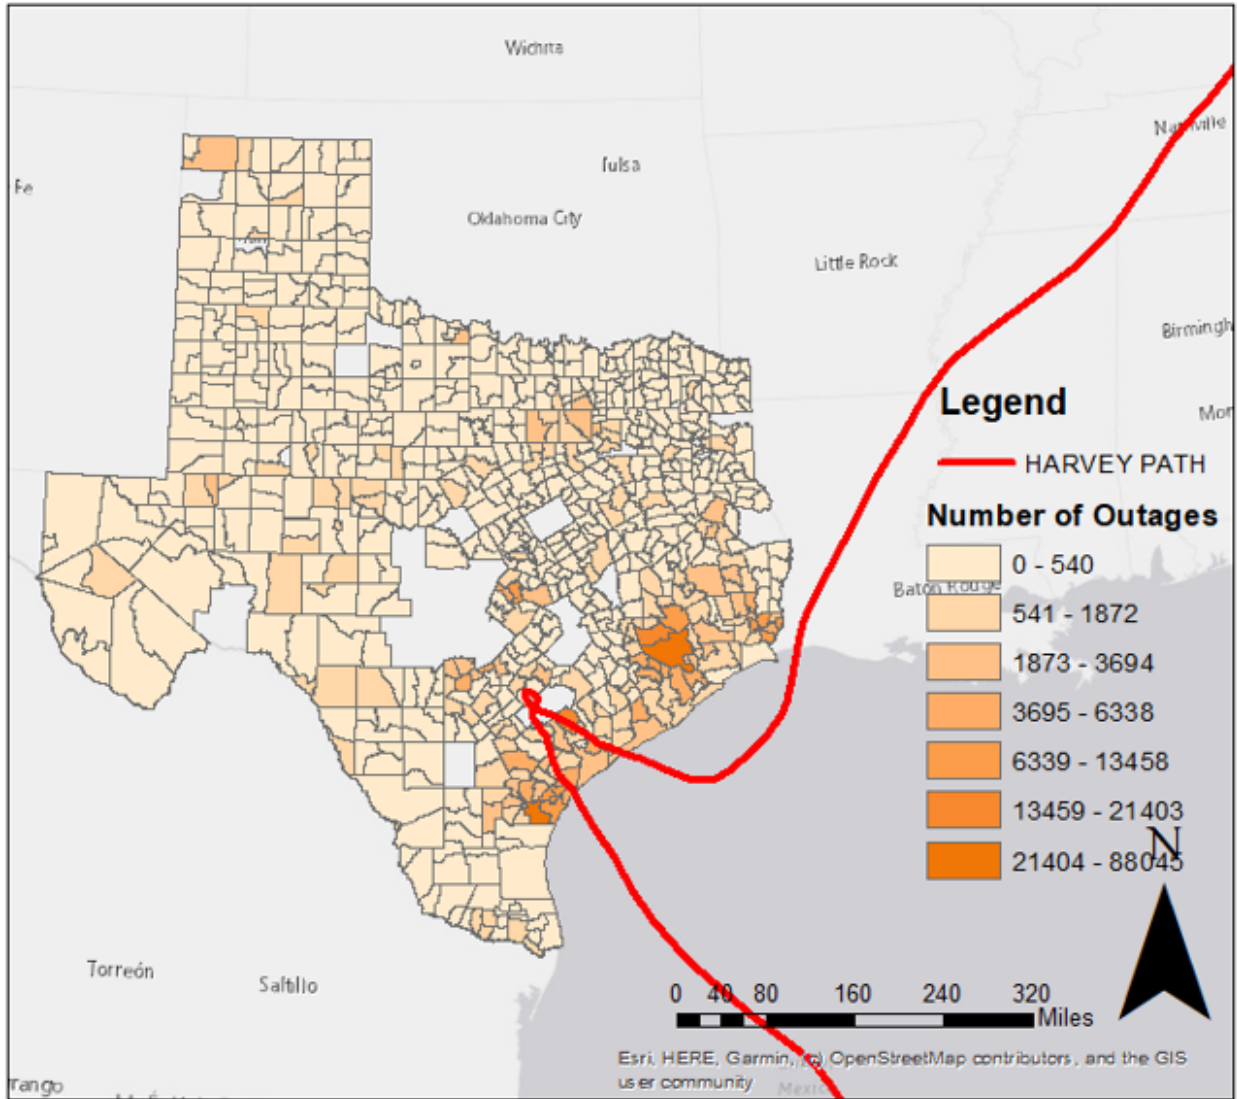

**Supplementary Figure S3.** Power outages caused by Hurricane Harvey (2017) in New York

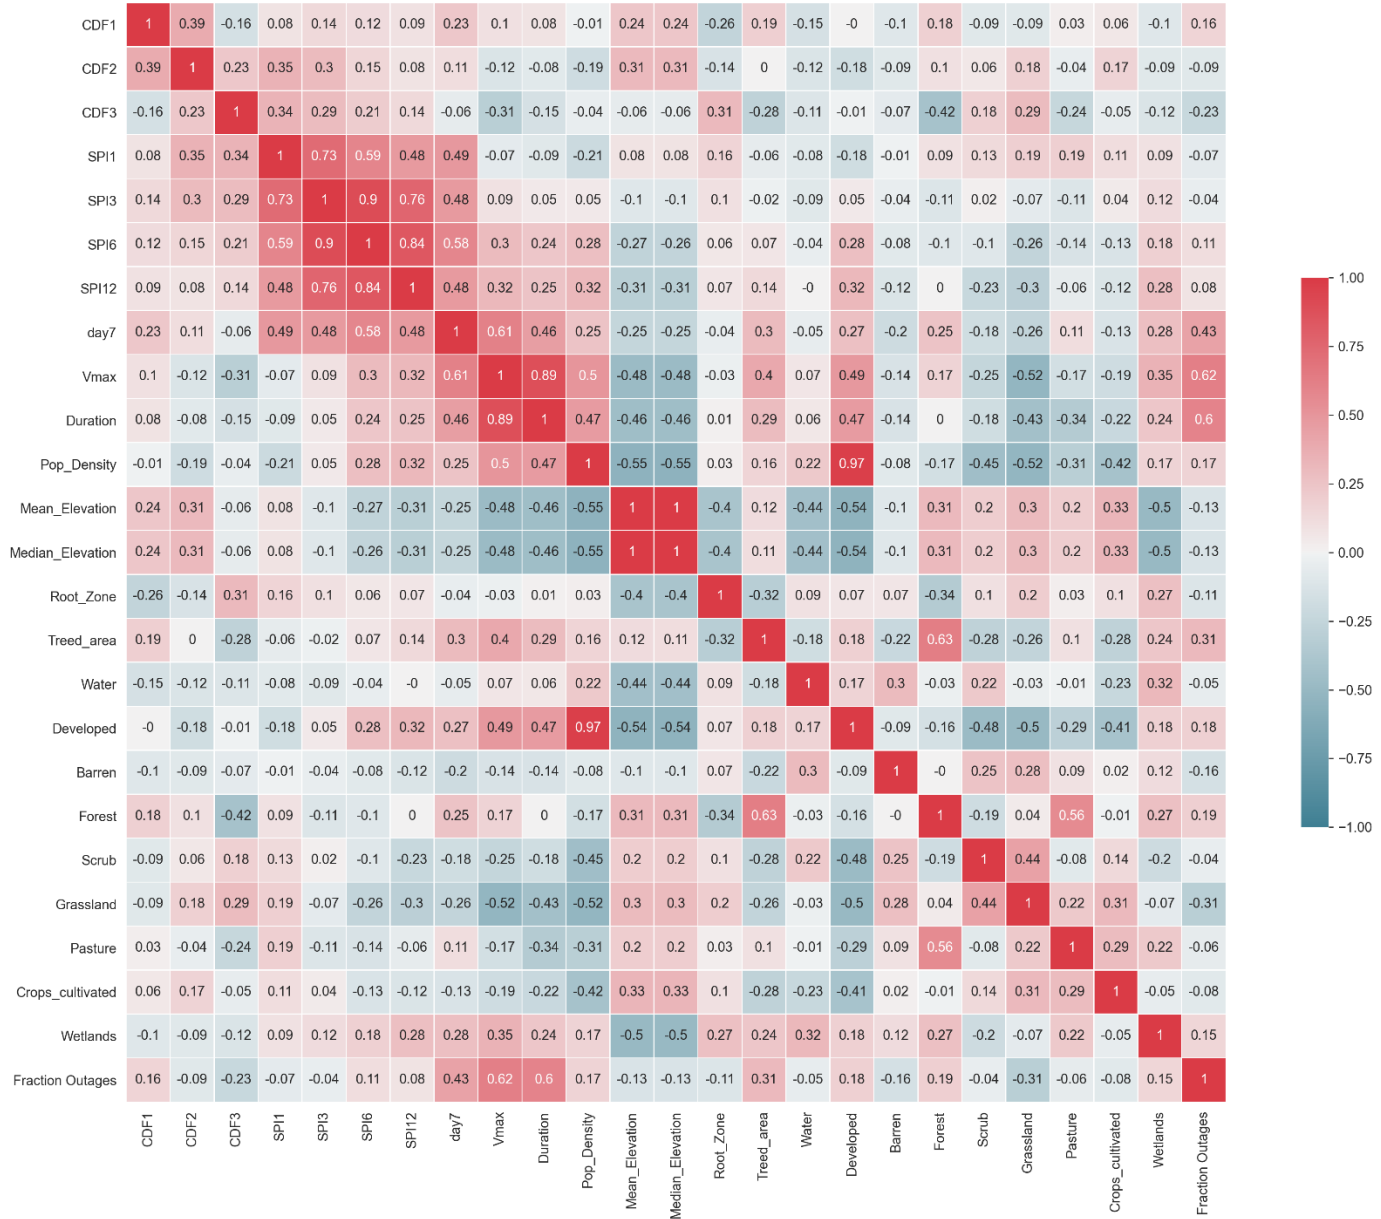

Supplementary Figure S4. Spearman correlation coefficient[1] for the variables listed in Table 1.

## **References**

- [1] M. Stephanou and M. Varughese, "Sequential estimation of Spearman rank correlation using Hermite series estimators," *J Multivar Anal*, vol. 186, Dec. 2020, doi:10.1016/j.jmva.2021.104783.
